1

# Host-Adapted Strains of *Spodoptera frugiperda* Hold and Share a Core Microbial Community Across the Western Hemisphere

<sup>1</sup>Nathalia C. Oliveira, <sup>1</sup>Pedro A.P. Rodrigues, <sup>1</sup>Fernando L. Cônsoli

<sup>1</sup>Insect Interactions Laboratory, Department of Entomology and Acarology, Luiz de Queiroz College of Agriculture, University of São Paulo, Piracicaba, São Paulo, Brazil

Nathalia Cavichioli de Oliveira – email: [nathaliaoliveira@usp.br](mailto:nathaliaoliveira@usp.br) ; ORCID iD: <https://orcid.org/0000-0003-1256-1510>

Pedro Augusto da Pos Rodrigues – email: [rodrigues.pap@gmail.com](mailto:rodrigues.pap@gmail.com); ORCID iD: <https://orcid.org/0000-0002-3280-7576>

Fernando Luís Cônsoli – email: [fconsoli@usp.br](mailto:fconsoli@usp.br); ORCID iD: <https://orcid.org/0000-0002-2287-0782>

## Correspondence

Fernando L. Cônsoli, Insect Interactions Laboratory, Department of Entomology and Acarology, Luiz de Queiroz College of Agriculture, University of São Paulo, Piracicaba, São Paulo, Brazil.

E-mail: [fconsoli@usp.br](mailto:fconsoli@usp.br)

## Abstract

The fall armyworm *Spodoptera frugiperda* is an important polyphagous agricultural pest in the Western Hemisphere and currently invasive to countries of the Eastern Hemisphere. This species has two host-adapted strains named “rice” and “corn” strains. Our goal was to identify the occurrence of core members in the gut bacterial community of Fall armyworm larvae from distinct geographical distribution and/or host strain. We used next-generation sequencing to identify the microbial communities of *S. frugiperda* from corn fields in Brazil, Colombia, Mexico, Panama, Paraguay, and Peru, and rice fields from Panama. The larval gut microbiota of *S. frugiperda* larvae did not differ between the host strains neither was it affected by the geographical distribution of the populations investigated. Our findings provide additional support for *Enterococcus* and *Pseudomonas* as core members of the bacterial community associated with the larval gut of *S. frugiperda*, regardless of the site of collection or strain, suggesting that these bacteria may maintain true symbiotic relationships with the fall armyworm. Further investigations are required for a deeper understanding of the nature of this relationship.

**Keywords:** Microbial ecology, dysbiosis, symbiosis, host adaptation

## Declarations

## Funding

This research was financed by the São Paulo Research Foundation (FAPESP) (process 2011/50877-0) and the Ministry of Science, Technology and Innovation (Conselho Nacional de Desenvolvimento Científico e Tecnológico – CNPq: process 462140-2014/8).

## Conflicts of interest/Competing interests

The authors declare no competing interests.

#### **Availability of data and material**

Upon paper acceptance, the data will be archived and the data regarding the deposited database and information such as access numbers will be provided for all manuscript data.

#### **Code availability**

Not applicable

#### **Contributions**

N.C.O. and F.L.C. conceived the study and designed the experiment. N.C.O. processed the samples. N.C.O. and P.A.P.R. conducted the bioinformatics. FLC secured funds for the project. N.C.O. wrote the first draft of the manuscript. P.A.P.R. and F.L.C. revised and edited the initial draft. All authors approved the final version for publication.

#### **Additional declarations for articles in life science journals that report the results of studies involving humans and/or animals**

Not applicable

#### **Ethics approval**

Not applicable

#### **Consent to participate**

All authors agree with the participation in this manuscript.

#### **Consent for publication**

All authors agree with the manuscript submission to Microbial Ecology Journal.

## 69 **Introduction**

70 The complexity and wide variety of host-microbe interactions are increasingly evident through new  
 71 molecular techniques and the improvement of bioinformatic analysis tools. The advancement of  
 72 understanding of this topic has brought support to some hypotheses, and challenged others. An example is  
 73 the discussion on whether the gut microbiota is relevant for all animals [1]. The gut is a rich environment  
 74 for holding a variety of host – microorganism associations, and the gut microbiota has been shown to play  
 75 crucial roles in a wide range of aspects of host physiology, morphology and ecology. The insect gut  
 76 microbiota can influence intra and interspecific interactions, such as sexual behavior [2, 3] and the  
 77 relationship between host plants and natural enemies [4]. It also plays a key role in insect adaptation to their  
 78 environment by providing essential nutrients [5, 6] and/or boosting the host immune response to parasites  
 79 and pathogens [7, 8]. In addition, microbial symbionts can contribute to hosts by detoxifying xenobiotics  
 80 as insecticides [9-12].

81 Such range of beneficial contributions has led to the establishment of true mutualistic associations in several  
 82 groups of hemipterans, dipterans, blattids, and coleopterans, among others [9, 13-17]. Lepidopteran larvae,  
 83 however, have been thought not to have established mutualistic associations with their gut-associated  
 84 bacteria. Some studies demonstrated the survival, development time, and weight gain were not affected in  
 85 antibiotic-fed larvae [18]. Additionally, the lack of special regions in the gut to house microorganisms has  
 86 been argued as a strong limitation for the establishment of true associations with free-living microbes [19].  
 87 The harshness of the extremely alkaline conditions of the gut to most microorganisms also represents an  
 88 unfavorable condition for establishing microbial associations [20]. Finally, the high variation in the  
 89 composition of the microbial community driven by host plants would difficult the occurrence of  
 90 associations that could hold through the required evolutionary time in order to allow the selection and  
 91 establishment of true gut residents [21]. Nevertheless, other studies have shown that even in hostile  
 92 environments as the midgut of lepidopteran larvae, there are evidence of gut colonization by certain  
 93 bacterial groups [22-24]. In addition, gut-resident bacteria of lepidopteran larvae were demonstrated to play

important physiological roles for their hosts [25, 26]; besides, the continuous association with their hosts for some of these microbes has been proved as they are horizontally transmitted [27].

Controversial topics in the scientific literature are always an invitation to new studies aiming at better understanding and clarification of the topic. The debated existence of true gut-associates in lepidoptera is a subject that needs further clarification due to two important contexts it is placed in. First, its remarkable relevance to the understanding of how microbial associations can influence host phenotypes [28], and insects have provided simple models for the clarification of fundamental principles in host-microbe interactions [29, 30], with a great potential to assist in unravelling complex systems such as in mammals. Second, lepidopterans are yet the major group of agricultural pests, causing severe losses in food production, posing serious threats to food security [31-33]. Understanding the diversity and function of gut - microbes associations can lead to the development of new strategies for herbivore control.

In the present study we have chosen a lepidopteran species that is important both in the ecological and in the economic context to investigate the existence of true gut associates of lepidopteran larvae. *Spodoptera frugiperda* is an important agricultural pest in the Western Hemisphere and is currently invasive to countries in Africa, Asia, and Oceania [34-38]. *Spodoptera frugiperda* is highly polyphagous, feeding on more than 300 host plants [39]. This species is actually a complex composed of two distinct strains known as the rice (RS) and corn (CS) strains. The two strains are morphologically identical, with clear differences in host preference, susceptibility to insecticides and transgenic crops (*Bacillus thuringiensis*), composition of sex pheromone and mating behavior [40-47]. Genomic analysis of the host-adapted strains of *S. frugiperda* identified several genes involved in the chemodetection of non-volatile molecules and detoxification of xenobiotics showing signatures of positive selection, suggesting their contribution to *S. frugiperda* host plant preferences [48]. Some of these genomic variations between host strains of *S. frugiperda* were also detected at the transcriptional level, including those involved in xenobiotic metabolism [49].

Genetic studies suggest that population structure of *S. frugiperda* in the Western Hemisphere shows more variation within *S. frugiperda* populations than between populations of different locations, indicating a

significant gene flow [50, 51]. The Mexican populations, on the other hand, have proven to be the most different, suggesting limited migratory interactions with foreign populations [52, 53]. The population genetic structure of Brazilian populations of *S. frugiperda* is partially based on host plants, with rice populations, which are basically represent by rice strain individuals, having a strong effect on the overall genetic structure of fall armyworm populations in Brazil [54].

Therefore, in this study we aim to verify the existence of bacterial groups that remain associated with the gut microbial community of *S. frugiperda* larvae regardless of the geographical region or host plant used. So, we sampled and sequenced the gut microbiota of fall armyworm larvae from corn and rice fields across the American continent. Larvae were genotyped as rice or corn strain, and the structure of the bacterial gut community was checked based on the geographical origin of the larvae, host-adapted strain and/or host plant used. Despite the variation expected due to uncontrolled and unforeseen environmental factors, the field conditions may provide essential information on potential symbionts that could be ecologically important to their hosts in their natural habitats.

## Material and Methods

### Sampling and strains identification

Larvae of *Spodoptera frugiperda* with 2.5-3.0 cm in length were collected from corn and/or rice fields during 2016-17 in Brazil (13.8224° S, 56.0835° W), Colombia (4.5709° N, 74.2973° W), Mexico (23.6345° N, 102.5528° W), Panama (8.5380° N, 80.7821° W), Paraguay (23.4425° S, 58.4438° W), and Peru (9.1900° S, 75.0152° W), and stored in absolute ethanol. Once in the laboratory, larvae had the width of the head capsule measured, and only those larvae with head capsule width within the limits of size of 5<sup>th</sup> and 6<sup>th</sup> instars [55] were further dissected for gut collection. Dissections were carried after surface sterilization under aseptic conditions in a laminar flow hood. The larval digestive tract was carefully

removed, washed in sterile saline and further used in metabarcoding analysis of the gut microbiota. The remaining carcass was used for host strain identification.

*Spodoptera frugiperda* were genotyped for strain identification using the mitochondrial *cytochrome oxidase I (COI)* gene as a marker. DNA was extracted using the genomic DNA preparation protocol from RNALater™, with modifications. The carcass obtained from dissected larvae was placed in 2 mL tubes with 750 µL digestion buffer (60 mM Tris pH 8.0, 100 mM EDTA, 0.5% SDS) and proteinase K (500 µg/mL), macerated using pestle, and mixed well by inversion. Samples were incubated overnight at 55°C. Afterwards, 750 µL of phenol:chloroform (1:1) was added and rapidly inverted for 2 min. Samples were centrifuged at high speed for 10 min. The aqueous layer was collected and phenol:chloroform extraction was repeated twice before a final extraction with chloroform. The aqueous layer was collected, added to 0.1 volume of 3M sodium acetate (pH 5.2) and an equal volume of 95% ethanol. Samples were then mixed by inversion, incubated for 40 min at -80°C before centrifugation (27,238 g x 30 min x 4°C). The pellet obtained was washed twice with 1 mL of 85% ice-cold ethanol, centrifuged for 10 min after each wash, and dried at 60°C during 5-10 min in a SpeedVac. Finally, the pellet was resuspended in nuclease-free water. DNA concentration and quality were estimated by spectrophotometry and standard DNA agarose gel electrophoresis [56].

Polymerase chain reactions (PCR) for partial amplification of the mitochondrial *COI* gene was conducted using the primer set JM76 (5'-GAGCTGAATTAGGRACCTCCAGG-3') and JM77 (5'-ATCACCTCCWCCTGCAGGATC-3'), to produce an expected amplicon of 569 base pairs (bp) [57]. The PCR mixture contained 100-150 ng of gDNA, 1.5 mM of MgCl<sub>2</sub>, 1x PCR buffer, 0.2 mM of each dNTP, 0.32 µM of each primer and 0.5U of GoTaq® DNA Polymerase (Promega) in a total volume of 25 µL. The thermocycling condition was 94°C x 1 min (1x), followed by 33 cycles at 92°C x 45 s, 56°C x 45 s, and 72°C x 1 min, and one cycle at 72°C x 3 min for final extension. Amplicons were then subjected to restriction analysis using the *MspI* (HpaII) restriction endonuclease. Samples were gently mixed, centrifuged for a few seconds and incubated overnight at 37°C. Subsequently, digestion and the resulting

products were verified using a 1.5% agarose gel electrophoresis. The corn strain (*CS*) was identified from restriction analyses yielding two fragments (497bp and 72bp), while restriction analyses that produced no digestion identified the rice strain (*RS*) [57].

#### DNA extraction, amplification and 16S rDNA sequencing

The midgut obtained from dissected larvae were individually powdered in liquid nitrogen, and genomic DNA was extracted using the Wizard Genomic DNA Purification Kit (Promega), following the manufacturer's recommendations. The quality, integrity and purity of the DNA obtained was measured by spectrophotometry and agarose gel electrophoresis as before. DNA samples were stored in -20°C and sent for library construction, normalization and sequencing in the Center for Functional Genomics (<http://www.esalq.usp.br/genomicafuncional/>), one of the multiusers laboratories of our institution. Paired-end reads were generated after amplifying the v3-v4 region of 16S rRNA gene (approximately 550 bp) using the Nextera XT DNA Library Preparation Kit (Illumina) for paired-end (2x 300 bp) sequencing in the Illumina MiSeq platform.

#### Sequences analyses

Illumina adapters at the 3' end of the reads were removed using *Cutadapt* [58]. The bioinformatics analyses of the gut microbiome were performed with QIIME2 v. 2020.2.0 [59]. Raw sequence data were quality filtered with *q2-dada2* plugin for filtering phiX reads and chimeric sequences [60]. In order to remove low quality regions from quality filter reads, *dada2 denoise-single* method trimmed off the first 18 nucleotides of the forward reads and 22 nucleotides from the reverse reads. It also truncated each sequence at position 290 in the forward and 220 in the reversed reads. These positions were chosen based on visual inspection of plotted quality scores from demultiplexed reads. A phylogeny was estimated with *SEPP* [61] as implemented in the *q2-fragment-insertion* QIIME2 plugin. All amplicon sequence variants (ASVs) were



aligned with *feature-classifier classify-sklearn* against the SILVA-132-99 database [62] that was trained with a Naïve Bayes classifier [63] on the Illumina 16S rRNA gene primers targeting the V3–V4 region.

The downstream analysis was performed in the MicrobiomeAnalyst web platform (<https://www.microbiomeanalyst.ca/>) [64] and in R (version 4.0.4) [65]. Data were filtered keeping ASV with minimum count of four (4) per library and low count filter based on 20% prevalence across samples. Data were rarefied to the minimum library size (1155 reads), before any statistical comparisons. Rarefaction curves were based on the relationship between number of ASVs and number of sequences. Alpha diversity analysis was measured by the observed species and Shannon index. The results were plotted across samples and showed as box plots for each group. Beta diversity was investigated through principal components analysis (PCoA) using unweighted and weighted UniFrac distances, and through hierarchical clustering analysis using unweighted UniFrac distances.

We used PERMANOVA to test the strength and statistical significance of sample groupings based on generalized weighted UniFrac distances. This distance contains an extra parameter  $\alpha$  (set at  $\alpha=0.5$ ) to control the weight of abundant lineages, so the distance is not dominated by highly abundant lineages. When differences were found between samples distances, a *post-hoc* analysis was performed with the package *pairwise.adonis* to identify differences among treatments and verify the adjusted *p* value [66]. As PERMANOVA assumes homogeneity of variances, we used *betadisper*, a multivariate analogue of Levene's test, as implemented in R to verify whether differences between groups in terms of their centroids are not due to differences in variances. Analysis of similarity (ANOSIM) was used when there was heterogeneity of variance among groups. In our sample set we had basically 3 groups: (i) countries that presented both strains in corn plants, (ii) countries with only the corn strain in corn plants and (iii) Panama with both strains in corn plants and only the rice strain in the rice plant. Since our design is unbalanced, we performed separate analyses to properly grasp our data. First, we excluded the samples that had rice as host plant, thus only the variables "strain" and "country" were considered. To test the effect of country and host plant, we excluded the corn strain from the analysis, considering only the rice strain, and performed

multilevel pairwise comparison using Adonis (PERMANOVA) from package *vegan* with adjusted *p*-values.

To visualize taxa abundance across the different groups, taxa plots were constructed based on phyla and genera. The core microbiome analysis was defined as the genera present in 50% or more of the samples and showing a relative abundance of 0.05% in each library. The differential abundance analysis was also analyzed using *DESeq2* methods [67]. Pattern Search was used to identify which features were correlated with the core microbiome in the gut microbial community. Pearson *r* was the distance measure used using the MicrobiomeAnalyst tool [64].

To cluster our samples groups into distinct ‘metacommunities’, we performed Dirichlet multinomial mixtures using the *get.communitytype* function [68] after exportation of biom ASV table from qiime2 to Mothur (v.1.44.3) and the selection of subsamples with *subsample=1000*, excluding low abundance samples that might be a result of artifact operational units and/or variation due to rare taxons ("singletons"). The best fitting number of metacommunities was obtained by selecting the minimum local Laplace value obtained after five iterations.

## Results

A total of 63 *S. frugiperda* individuals, 8 *RS* and 45 *CS* were used in our analyses. Except for 8 specimens from Panama that were collected on rice, all other samples were collected in corn fields. Out of the 63 specimens analyzed, 21 were from Brazil (*CS*=18; *RS*=3), nine from Colombia (*CS*=8; *RS*=1), eight from Mexico (*CS*=8), six from Paraguay (*CS*=3; *RS*=3), five from Peru (*CS*=3; *RS*=2), and 13 from Panama (6 from corn fields; *CS*=5, *RS*=1; and 8 from rice fields; *RS*=8).

Rarefaction analysis (Fig. S1) showed that sampling was adequate for an accurate characterization of the diversity and richness of the larval gut microbiota of *S. frugiperda*. Samples that failed to achieve adequate sampling depth were excluded from further analyses. There was no difference in alpha-diversity values

between strains or among countries (Fig. 1) measure by observed species and Shannon diversity indices. The beta diversity measured by weighted Unifrac distances did not exhibit specific clustering based on the country of origin or *S. frugiperda* strains (Fig. 2).

When considering samples collected in maize, no differences in the composition of the gut microbial community between strains ( $p=0.215$ ) (Table 1) nor among different countries considering the adjusted  $p$ -values ( $p$ -values  $< 0.05$ ) were detected (Table 2). Betadisper showed that groups had the same dispersion, failing to reject the null hypothesis of homogeneous multivariate dispersions, meeting the assumption for Adonis (Table 1). It thus provided confidence to the PERMANOVA results, meaning the values obtained were not an artifact of heterogeneity of dispersions. Likewise, no differences were found between host plants ( $p=0.344$ ) or country ( $p=0.0709$ ) when considering only the rice strain (Table 3). Additionally, all replicates of metacommunity analyses resulted in the same pattern ( $K=1$ ), meaning that according to the Dirichlet model there is not a clear pattern of grouping ASVs across samples.

At the phylum level, the midgut of *S. frugiperda* was composed by *Proteobacteria*, *Firmicutes* and *Actinobacteria* (Fig. 3). There was no significant difference at the phylum level among countries or between strains. Taxa bar plots at the genus level indicated that individuals from the same country exhibited a high degree of variability in terms of bacteria taxa abundance (Fig. 4). *Klebsiella* and *Erysipelatoclostridium* were the taxa that differed among countries (Fig. 5), and the abundance of *Erysipelatoclostridium* also differed between RS and CS (Fig. 6).

The bacterial core of the larval midgut of *S. frugiperda* at the genus level was composed by *Pseudomonas* and *Enterococcus*. Correlation analysis identified 10 genera that were positively correlated and 10 genera negatively correlated with *Pseudomonas*. However, only three genera were positively correlated, while 18 were negatively correlated with *Enterococcus* (Fig. 7).

## Discussion

Our results indicate that bacterial communities of the Fall armyworm larval midgut do not differ between strains collected from the same country nor among countries. These findings follow the pattern of the population genetic structure of *S. frugiperda* in the Western Hemisphere, where the majority of the genetic variability is within individual populations and not between populations, suggesting that populations of *S. frugiperda* functions as a panmictic population [50, 51].

As expected, we detected high variations in the composition of the gut microbiota among larvae. Such differences are likely to occur due to differences in corn varieties and associated endophytes, and soil type and associated microbiota, which also interact with plants and affect the plant endophyte community, ultimately interfering with the microbial composition of herbivores [69-71]. Variation in the microbiota from individual samples within treatments is commonly reported to several organisms, including species of Lepidoptera [72-74]. In humans, interindividual variation in the populations of gut microbes can be higher than 90% [75].

Obadia and collaborators [76] exploring the colonization of bacteria in the *Drosophila melanogaster* gut found that several strains of different species can maintain a stable association with the fly gut under laboratory conditions. They demonstrated that the establishment of bacteria in the gut works like a lottery and that stochastic factors generate alternative, stable states of gut colonization. Moreover, the resident species that have colonized the larval gut earlier, reduced the chances of subsequent colonization. Another interesting point raised concerning our study was that the peritrophic matrix in the midgut prevents the bacteria from attaching to the epithelial cells. Therefore, the lack of tissue attachment potentially makes these luminal populations less stable within the gut.

But regardless the high variation observed in the gut microbiota associated with the larval midgut of *S. frugiperda*, our analysis identified a core of bacteria despite the geographical origin of fall armyworm samples. The maintenance of a core independently of any interfering systemic effects points to the existence of bacterial associates with specific functions. In addition, the high variability in the composition of the midgut microbiota may allow for rapid host adaptation through rapid selection of microbiota suitable for

contributing to the host under different stress conditions, such as abiotic factors, dietary resources, and risk of natural enemy attack [77].

The ASVs *Pseudomonas* and *Enterococcus* identified in this study as core members of the microbiota of the fall armyworm were also identified before as part of the core taxa associated with the gut of *S. frugiperda* larvae from corn fields [10, 77-80]. The high abundance of *Pseudomonas* in our samples suggests that this genus of bacteria could assist *S. frugiperda* larvae to overcome environmental stressors, particularly by aiding larvae to degrade natural and/or synthetic toxic xenobiotics. *Pseudomonas* capable to degrade several pesticides were recovered from the gut of laboratory-selected resistant lines (Almeida, Moraes, Trigo, Omoto, & Cônsoli, 2017), but also from field populations of *S. frugiperda* collected from several corn-producing areas in Brazil (Gomes, Omoto, & Cônsoli, 2020). *Pseudomonas* have also been demonstrated to degrade secondary metabolites in the gut of a coleopteran host [81]. Additionally, *Pseudomonas* abundance increased in the gut of *Plutella xylostella* resistant to prothiofos when compared to susceptible larvae, and was also shown to have antagonistic activity to several species of entomopathogenic fungi through siderophore production as demonstrated in culture plates [82].

It is noteworthy that *Enterococcus* is the most prevalent and abundant group identified in the gut microbiota of *Spodoptera* species [78, 79, 83], and also the most active in the gut of *S. frugiperda* [84]. Additionally, it has been demonstrated that *Enterococcus mundtii* is effective in colonizing and forming biofilm in the gut of *Spodoptera littoralis* [22, 27]. There is also evidence that *E. mundtii* can be inherited by *S. littoralis* through vertical transmission [23]. Some species of *Enterococcus* produce antimicrobial peptides with high level of inhibitory activity against potential bacterial competitors [27], which may explain its prevalence when compared to other phylotypes in *S. frugiperda* gut communities, but also the high negative correlation of *Enterococcus* with the other bacterial species of the gut microbiota community of *S. frugiperda* in this study.

Overall, this study provided an extended view of the fall armyworm gut microbiota and supported the hypothesis that bacterial taxonomic compositions across different localities in the Western Hemisphere are

similar to each other, presenting high inter-individual variance, and that there are no significant differences in gut microbiota composition between the host-adapted strains of *S. frugiperda*. Nevertheless, our findings provide further evidence that *Pseudomonas* and *Enterococcus* are true symbionts of *S. frugiperda* as they were identified in the gut microbiota of *S. frugiperda* larvae regardless the host plant and site of collection. Further investigations on the functional contribution of these species as members of the gut bacterial community of fall armyworm larvae is required for a deeper understanding of the nature of this relationship.

## Acknowledgements

We are grateful to the São Paulo Research Foundation (FAPESP) (process 2011/50877-0) and the Ministry of Science, Technology and Innovation (Conselho Nacional de Desenvolvimento Científico e Tecnológico – CNPq; process 462140-2014/8) for the grant provided to the senior author. The HPC resources made available by the Superintendence of Information Technology of the University of São Paulo. We also thank FAPESP for the PhD student fellowship (2017/24377-7) provided to the first author. We also would like to thank our collaborators from Panama, Peru, Colombia, Paraguay and Brazil who helped us with the field collection of larval samples. This manuscript is one of the chapters of the PhD Thesis of the first author.

## References

1. Hammer TJ, Sanders JG, Fierer N (2019) Not all animals need a microbiome. *FEMS Microbiol Lett* 366: fnz117. <https://doi.org/10.1093/femsle/fnz117>
2. Sharon G, Segal D, Ringo JM, Hefetz A, Zilber-Rosenberg I, Rosenberg E (2010) Commensal bacteria play a role in mating preference of *Drosophila melanogaster*. *Proc Natl Acad Sci U S A* 107: 20051-20056. <https://doi.org/10.1073/pnas.1009906107>
3. Sharon G, Segal D, Zilber-Rosenberg I, Rosenberg E (2011) Symbiotic bacteria are responsible for diet-induced mating preference in *Drosophila melanogaster*, providing support for the hologenome concept of evolution. *Gut Microbes* 2: 190-192. <https://doi.org/10.4161/gmic.2.3.16103>
4. Frago E, Dicke M, Godfray HCJ (2012) Insect symbionts as hidden players in insect–plant interactions. *Trends Ecol Evol* 27: 705-711. <https://doi.org/10.1016/j.tree.2012.08.013>
5. Douglas AE (2009) The microbial dimension in insect nutritional ecology. *Funct Ecol* 23: 38-47. <https://doi.org/10.1111/j.1365-2435.2008.01442.x>
6. Engel P, Moran NA (2013) The gut microbiota of insects—diversity in structure and function. *FEMS Microbiol Rev* 37: 699-735. <https://doi.org/10.1111/1574-6976.12025>
7. Azambuja P, Feder D, Garcia ES (2004) Isolation of *Serratia marcescens* in the midgut of *Rhodnius prolixus*: impact on the establishment of the parasite *Trypanosoma cruzi* in the vector. *Exp Parasitol* 107: 89-96. <https://doi.org/10.1016/j.exppara.2004.04.007>
8. Oliveira NC de, Cônsoli FL (2020) Beyond host regulation: Changes in gut microbiome of permissive and non-permissive hosts following parasitization by the wasp *Cotesia flavipes*. *FEMS Microbiol Ecol* 96(2): fiz206. <https://doi.org/10.1093/femsec/fiz206>

- 353 9. Kikuchi Y, Hosokawa T, Fukatsu T (2011) An ancient but promiscuous host–symbiont association  
354 between *Burkholderia* gut symbionts and their heteropteran hosts. ISME J 5: 446-460.  
355 <https://doi.org/10.1038/ismej.2010.150>
- 356 10. Gomes AFF, Omoto C, Cônsoli FL (2020) Gut bacteria of field-collected larvae of *Spodoptera*  
357 *frugiperda* undergo selection and are more diverse and active in metabolizing multiple insecticides than  
358 laboratory-selected resistant strains. J Pest Sci 93: 833-851. <https://doi.org/10.1007/s10340-020-01202-0>
- 359 11. Chen B, Zhang N, Xie S, Zhang X, He J, Muhammad A, Sun C, Lu X, Shao Y (2020) Gut bacteria of  
360 the silkworm *Bombyx mori* facilitate host resistance against the toxic effects of organophosphate  
361 insecticides. Environ Int 143: 105886. <https://doi.org/10.1016/j.envint.2020.105886>
- 362 12. Almeida LGd, Moraes LABd, Trigo JR, Omoto C, Cônsoli FL (2017) The gut microbiota of insecticide-  
363 resistant insects houses insecticide-degrading bacteria: A potential source for biotechnological exploitation.  
364 PLoS One 12: e0174754. <https://doi.org/10.1371/journal.pone.0174754>
- 365 13. Chu C-C, Spencer JL, Curzi MJ, Zavala JA, Seufferheld MJ (2013) Gut bacteria facilitate adaptation to  
366 crop rotation in the western corn rootworm. Proc Natl Acad Sci U S A 110: 11917-11922.  
367 <https://doi.org/10.1073/pnas.1301886110>
- 368 14. Hosokawa T, Kikuchi Y, Nikoh N, Shimada M, Fukatsu T (2006) Strict host-symbiont co-speciation  
369 and reductive genome evolution in insect gut bacteria. PLoS Biol 4: e337.  
370 <https://doi.org/10.1371/journal.pbio.0040337>
- 371 15. Koch H, Schmid-Hempel P (2011) Socially transmitted gut microbiota protect bumble bees against an  
372 intestinal parasite. Proc Natl Acad Sci U S A 108: 19288-19292. <https://doi.org/10.1073/pnas.1110474108>
- 373 16. Cheng D, Guo Z, Riegler M, Xi Z, Liang G, Xu Y (2017) Gut symbiont enhances insecticide resistance  
374 in a significant pest, the oriental fruit fly *Bactrocera dorsalis* (Hendel). Microbiome 5: 13.  
375 <https://doi.org/10.1186/s40168-017-0236-z>



- 376 17. Salcedo-Porras N, Umaña-Diaz C, Bitencourt RdOB, Lowenberger C (2020) The role of bacterial  
377 symbionts in Triatomines: an evolutionary perspective. *Microorganisms* 8: 1438.  
378 <https://doi.org/10.3390/microorganisms8091438>
- 379 18. Hammer TJ, Janzen DH, Hallwachs W, Jaffe SP, Fierer N (2017) Caterpillars lack a resident gut  
380 microbiome. *Proc Natl Acad Sci U S A* 114: 9641-9646. <https://doi.org/10.1073/pnas.1707186114>
- 381 19. Appel HM (2017) The chewing herbivore gut lumen: physicochemical conditions and their impact on  
382 plant nutrients, allelochemicals, and insect pathogens. In: Bernays EA (Ed.), *Insect-Plant Interactions*. CRC  
383 Press, pp. 209-224
- 384 20. Dow JA (1984) Extremely high pH in biological systems: a model for carbonate transport. *Am J Physiol*  
385 246: R633-R636. <https://doi.org/10.1152/ajpregu.1984.246.4.R633>
- 386 21. Gayatri Priya N, Ojha A, Kajla MK, Raj A, Rajagopal R (2012) Host plant induced variation in gut  
387 bacteria of *Helicoverpa armigera*. *PLoS One* 7: e30768. <https://doi.org/10.1371/journal.pone.0030768>
- 388 22. Mazumdar T, Teh BS, Murali A, Schmidt-Heck W, Vogel H, Schlenker Y, Boland W (2021) Survival  
389 strategies of *Enterococcus mundtii* in the gut of *Spodoptera littoralis*: a live report. *J Chem Ecol* 47: 227-  
390 241. <https://doi.org/10.1007/s10886-021-01246-1>.
- 391 23. Teh B-S, Apel J, Shao Y, Boland W (2016) Colonization of the intestinal tract of the polyphagous pest  
392 *Spodoptera littoralis* with the GFP-tagged indigenous gut bacterium *Enterococcus mundtii*. *Front Microbiol*  
393 7: 928. <https://doi.org/10.3389/fmicb.2016.00928>
- 394 24. Mason CJ, St. Clair A, Peiffer M, Gomez E, Jones AG, Felton GW, Hoover K (2020) Diet influences  
395 proliferation and stability of gut bacterial populations in herbivorous lepidopteran larvae. *PLoS One* 15:  
396 e0229848. <https://doi.org/10.1371/journal.pone.0229848>

- 397 25. Shao Y, Arias-Cordero E, Guo H, Bartram S, Boland W (2014) In vivo pyro-SIP assessing active gut  
398 microbiota of the Cotton Leafworm, *Spodoptera littoralis*. PLoS One 9: e85948.  
399 <https://doi.org/10.1371/journal.pone.0085948>
- 400 26. Xia X, Lan B, Tao X, Lin J, You M (2020) Characterization of *Spodoptera litura* gut bacteria and their  
401 role in feeding and growth of the host. Front Microbiol 11: 1492. <https://doi.org/10.3389/fmicb.2020.01492>
- 402 27. Shao Y, Chen B, Sun C, Ishida K, Hertweck C, Boland W (2017) Symbiont-derived antimicrobials  
403 contribute to the control of the lepidopteran gut microbiota. Cell Chem Biol 24: 66-75.  
404 <https://doi.org/10.1016/j.chembiol.2016.11.015>
- 405 28. Moya A, Pereto J, Gil R, Latorre A (2008) Learning how to live together: genomic insights into  
406 prokaryote-animal symbioses. Nature Rev Genet 9: 218-229. <https://doi.org/10.1038/nrg2319>
- 407 29. Douglas AE (2011) Lessons from studying insect symbioses. Cell Host Microbe 10: 359-367.  
408 <https://doi.org/10.1016/j.chom.2011.09.001>
- 409 30. Kostic AD, Howitt MR, Garrett WS (2013) Exploring host–microbiota interactions in animal models  
410 and humans. Genes Dev 27: 701-718. <https://doi.org/10.1101/gad.212522.112>
- 411 31. Scoble MJ (1992) The Lepidoptera. Form, function and diversity. Oxford University Press.
- 412 32. McCaffery AR (1998) Resistance to insecticides in Heliothine Lepidoptera: a global view. Philos Trans  
413 R Soc Lond B Biol Sci 353: 1735-1750. <https://doi.org/10.1098/rstb.1998.0326>
- 414 33. Riegler M (2018) Insect threats to food security. Science 361: 846.  
415 <https://doi.org/10.1126/science.aau7311>
- 416 34. Goergen G, Kumar PL, Sankung SB, Togola A, Tamò M (2016) First report of outbreaks of the fall  
417 armyworm *Spodoptera frugiperda* (JE Smith) (Lepidoptera, Noctuidae), a new alien invasive pest in West  
418 and Central Africa. PLoS One 11: e0165632. <https://doi.org/10.1371/journal.pone.0165632>

35. Johnson SJ (1987) Migration and the life history strategy of the fall armyworm, *Spodoptera frugiperda* in the Western Hemisphere. Int J Trop Insect Sci 8: 543-549. <https://doi.org/10.1017/S1742758400022591>
36. Otim MH, Tay WT, Walsh TK, Kanyesigye D, Adumo S, Abongosi J, Ochen S, Sserumaga J, Alibu S, Abalo G, Asea G, Agona A (2018) Detection of sister-species in invasive populations of the fall armyworm *Spodoptera frugiperda* (Lepidoptera: Noctuidae) from Uganda. PLoS One 13: e0194571. <https://doi.org/10.1371/journal.pone.0194571>
37. Padhee AK, Prasanna BM (2019) The emerging threat of Fall Armyworm in India. Indian Farm 69: 51-54.
38. Piggott MP, Tadle FPJ, Patel S, Gomez KC, Thistleton B (2021) Corn-strain or rice-strain? Detection of fall armyworm, *Spodoptera frugiperda* (JE Smith) (Lepidoptera: Noctuidae), in northern Australia. Int J Trop Insect Sci 41: 2607-2615. <https://doi.org/10.1007/s42690-021-00441-7>
39. Montezano DG, Specht A, Sosa-Gómez DR, Roque-Specht VF, Sousa-Silva JC, Paula-Moraes SVd, Peterson JA, Hunt TE (2018) Host plants of *Spodoptera frugiperda* (Lepidoptera: Noctuidae) in the Americas. African Entomol 26: 286-300. <https://doi.org/10.4001/003.026.0286>
40. Adameczyk Jr JJ, Holloway JW, Leonard BR, Graves JB (1997) Susceptibility of fall armyworm collected from different plant hosts to selected insecticides and transgenic Bt cotton. J Cotton Sci 1: 21-28.
41. Cruz-Esteban S, Rojas JC, Sánchez-Guillén D, Cruz-López L, Malo EA (2018) Geographic variation in pheromone component ratio and antennal responses, but not in attraction, to sex pheromones among fall armyworm populations infesting corn in Mexico. J Pest Sci 91: 973-983. <https://doi.org/10.1007/s10340-018-0967-z>
42. Lima ER, McNeil JN (2009) Female sex pheromones in the host races and hybrids of the fall armyworm, *Spodoptera frugiperda* (Lepidoptera: Noctuidae). Chemoecology 19: 29-36. <https://doi.org/10.1007/s00049-009-0005-y>

- 442 43. Schöfl G, Heckel DG, Groot AT (2009) Time-shifted reproductive behaviours among fall armyworm  
443 (Noctuidae: *Spodoptera frugiperda*) host strains: evidence for differing modes of inheritance. J Evol Biol  
444 22: 1447-1459. <https://doi.org/10.1111/j.1420-9101.2009.01759.x>
- 445 44. Veenstra KH, Pashley DP, Ottea JA (1995) Host-plant adaptation in fall armyworm host strains:  
446 comparison of food consumption, utilization, and detoxification enzyme activities. Ann Entomol Soc Am  
447 88: 80-91. <https://doi.org/10.1093/aesa/88.1.80>
- 448 45. Pashley DP, Hardy TN, Hammond AM (1995) Host effects on developmental and reproductive traits  
449 in fall armyworm strains (Lepidoptera: Noctuidae). Ann Entomol Soc Am 88: 748-755.  
450 <https://doi.org/10.1093/aesa/88.6.748>
- 451 46. Orsucci M, Mone Y, Audiot P, Gimenez S, Nhim S, Nait-Saidi R, Frayssinet M, Dumont G, Boudon J-  
452 P, Vabre M (2020) Transcriptional differences between the two host strains of *Spodoptera frugiperda*  
453 (Lepidoptera: Noctuidae). bioRxiv: 263186. <https://doi.org/10.1101/263186>
- 454 47. Ingber DA, Mason CE, Flexner L (2018) Cry1 Bt susceptibilities of fall armyworm (Lepidoptera:  
455 Noctuidae) host strains. J Econ Entomol 111: 361-368. <https://doi.org/10.1093/jee/tox311>
- 456 48. Gouin A, Bretaudeau A, Nam K, Gimenez S, Aury JM, Duvic B, Hilliou F, Durand N, Montagné N,  
457 Darboux I, Kuwar S, Chertemps T, Siaussat D, Bretschneider A, Moné Y, Ahn SJ, Hänniger S, Grenet  
458 ASG, Neunemann D, Maumus F, Luyten I, Labadie K, Xu W, Koutroumpa F, Escoubas JM, Llopis A,  
459 Maïbèche-Coisne M, Salasc F, Tomar A, Anderson AR, Khan SA, Dumas P, Orsucci M, Guy J, Belser C,  
460 Alberti A, Noel B, Couloux A, Mercier J, Nidelet S, Dubois E, Liu NY, Boulogne I, Mirabeau O, Le Goff  
461 G, Gordon G, Oakeshott J, Consoli FL, Volkoff AN, Fescemyer HW, Marden JH, Luthe DS, Herrero S,  
462 Heckel DG, Wincker P, Kergoat GJ, Amselem J, Quesneville H, Groot AT, Jacquin-Joly E, Nègre N,  
463 Lemaitre C, Legeai F, d'Alençon E, Fourniere P (2017) Two genomes of highly polyphagous lepidopteran  
464 pests (*Spodoptera frugiperda*, Noctuidae) with different host-plant ranges. Sci Rep 7: 11816.  
465 <https://doi.org/10.1038/s41598-017-10461-4>

- 466 49. Silva-Brandão KL, Horikoshi RJ, Bernardi D, Omoto C, Figueira A, Brandão MM (2017) Transcript  
467 expression plasticity as a response to alternative larval host plants in the speciation process of corn and rice  
468 strains of *Spodoptera frugiperda*. BMC Genomics 18: 792. <https://doi.org/10.1186/s12864-017-4170-z>
- 469 50. Clark PL, Molina-Ochoa J, Martinelli S, Skoda SR, Isenhour DJ, Lee DJ, Krumm JT, Foster JE (2007)  
470 Population variation of the fall armyworm, *Spodoptera frugiperda*, in the Western Hemisphere. J Insect Sci  
471 7: 1-10. <https://doi.org/10.1673/031.007.0501>
- 472 51. Arias O, Cordeiro E, Corrêa AS, Domingues FA, Guidolin AS, Omoto C (2019) Population genetic  
473 structure and demographic history of *Spodoptera frugiperda* (Lepidoptera: Noctuidae): implications for  
474 insect resistance management programs. Pest Manag Sci 75: 2948-2957. <https://doi.org/10.1002/ps.5407>
- 475 52. Nagoshi RN, Rosas-García NM, Meagher RL, Fleischer SJ, Westbrook JK, Sappington TW, Hay-Roe  
476 M, Thomas JMG, Murúa GM (2015) Haplotype profile comparisons between *Spodoptera frugiperda*  
477 (Lepidoptera: Noctuidae) populations from Mexico with those from Puerto Rico, South America, and the  
478 United States and their implications to migratory behavior. J Econ Entomol 108: 135-144.  
479 <https://doi.org/10.1093/jee/tou044>
- 480 53. Tay WT, Rane R, Padovan A, Walsh T, Elfekih S, Downes S, Nam K, d'Alençon E, Zhang J, Wu Y,  
481 Nègre N, Kunz D, Kriticos DJ, Czapak C, Otim M, Gordon KHJ (2020) Whole genome sequencing of  
482 global *Spodoptera frugiperda* populations: evidence for complex, multiple introductions across the Old  
483 World. bioRxiv: 2020.2006.2012.147660. <https://doi.org/10.1101/2020.06.12.147660>
- 484 54. Silva-Brandão KL, Peruchi A, Seraphim N, Murad NF, Carvalho RA, Farias JR, Omoto C, Cônsoli FL,  
485 Figueira A, Brandão MM (2018) Loci under selection and markers associated with host plant and host-  
486 related strains shape the genetic structure of Brazilian populations of *Spodoptera frugiperda* (Lepidoptera,  
487 Noctuidae). PLoS One 13: e0197378. <https://doi.org/10.1371/journal.pone.0197378>
- 488 55. Montezano DG, Specht A, Sosa-Gomez DR, Roque-Specht VF, de Paula-Moraes SV, Peterson JA,  
489 Hunt TE (2019) Developmental parameters of *Spodoptera frugiperda* (Lepidoptera: Noctuidae) immature

490 stages under controlled and standardized conditions. J Agric Sci 11(8): 76.  
 491 <https://doi.org/10.5539/jas.v11n8p76> .

492 56. Sambrook J (2001) Molecular cloning: a laboratory manual/Joseph Sambrook, David W. Russell. Cold  
 493 Spring Harbor, NY: Cold Spring Harbor Laboratory.

494 57. Levy HC, Garcia-Maruniak A, Maruniak JE (2002) Strain identification of *Spodoptera frugiperda*  
 495 (Lepidoptera: Noctuidae) insects and cell line: PCR-RFLP of cytochrome oxidase C subunit I gene. Fla  
 496 Entomol 85: 186-191. [https://doi.org/10.1653/0015-4040\(2002\)085\[0186:SIOSFL\]2.0.CO;2](https://doi.org/10.1653/0015-4040(2002)085[0186:SIOSFL]2.0.CO;2)

497 58. Martin M (2011) Cutadapt removes adapter sequences from high-throughput sequencing reads.  
 498 EMBnet.journal 17(1): 10-12. <https://doi.org/10.14806/ej.17.1.200..>

499 59. Bolyen E, Rideout JR, Dillon MR, Bokulich NA, Abnet CC, Al-Ghalith GA, Alexander H, Alm EJ,  
 500 Arumugam M, Asnicar F, Bai Y, Bisanz JE, Bittinger K, Brejnrod A, Brislawn CJ, Brown CT, Callahan  
 501 BJ, Caraballo-Rodríguez AM, Chase J, Cope EK, Da Silva R, Diener C, Dorrestein PC, Douglas GM,  
 502 Durall DM, Duvallet C, Edwardson CF, Ernst M, Estaki M, Fouquier J, Gauglitz JM, Gibbons SM, Gibson  
 503 DL, Gonzalez A, Gorlick K, Guo J, Hillmann B, Holmes S, Holste H, Huttenhower C, Huttley GA, Janssen  
 504 S, Jarmusch AK, Jiang L, Kaehler BD, Kang KB, Keefe CR, Keim P, Kelley ST, Knights D, Koester I,  
 505 Kosciolk T, Kreps J, Langille MGI, Lee J, Ley R, Liu Y-X, Loftfield E, Lozupone C, Maher M, Marotz  
 506 C, Martin BD, McDonald D, McIver LJ, Melnik AV, Metcalf JL, Morgan SC, Morton JT, Naimey AT,  
 507 Navas-Molina JA, Nothias LF, Orchanian SB, Pearson T, Peoples SL, Petras D, Preuss ML, Pruesse E,  
 508 Rasmussen LB, Rivers A, Robeson MS, Rosenthal P, Segata N, Shaffer M, Shiffer A, Sinha R, Song SJ,  
 509 Spear JR, Swafford AD, Thompson LR, Torres PJ, Trinh P, Tripathi A, Turnbaugh PJ, Ul-Hasan S, van der  
 510 Hooft JJJ, Vargas F, Vázquez-Baeza Y, Vogtmann E, von Hippel M, Walters W, Wan Y, Wang M, Warren  
 511 J, Weber KC, Williamson CHD, Willis AD, Xu ZZ, Zaneveld JR, Zhang Y, Zhu Q, Knight R, Caporaso  
 512 JG (2019) Reproducible, interactive, scalable and extensible microbiome data science using QIIME 2. Nat  
 513 Biotechnol 37: 852-857. <https://doi.org/10.1038/s41587-019-0209-9>

514 60. Callahan BJ, McMurdie PJ, Rosen MJ, Han AW, Johnson AJA, Holmes SP (2016) DADA2: high-  
515 resolution sample inference from Illumina amplicon data. *Nat Methods* 13: 581-583.  
516 <https://doi.org/10.1038/nmeth.3869>

517 61. Mirarab S, Nguyen N, Warnow T (2012) SEPP: SATé-enabled phylogenetic placement. *Pac Symp*  
518 *Biocomput* 2012: 247-258. [https://doi.org/10.1142/9789814366496\\_0024](https://doi.org/10.1142/9789814366496_0024)

519 62. Quast C, Pruesse E, Yilmaz P, Gerken J, Schweer T, Yarza P, Peplies J, Glöckner FO (2012) The  
520 SILVA ribosomal RNA gene database project: improved data processing and web-based tools. *Nucleic*  
521 *Acids Res* 41: D590-D596. <https://doi.org/10.1093/nar/gks1219>

522 63. Bokulich NA, Kaehler BD, Rideout JR, Dillon M, Bolyen E, Knight R, Huttley GA, Caporaso JG (2018)  
523 Optimizing taxonomic classification of marker-gene amplicon sequences with QIIME 2's q2-feature-  
524 classifier plugin. *Microbiome* 6: 90. <https://doi.org/10.1186/s40168-018-0470-z>

525 64. Chong J, Liu P, Zhou G, Xia J (2020) Using MicrobiomeAnalyst for comprehensive statistical,  
526 functional, and meta-analysis of microbiome data. *Nat Protoc* 15: 799-821. [https://doi.org/10.1038/s41596-](https://doi.org/10.1038/s41596-019-0264-1)  
527 [019-0264-1](https://doi.org/10.1038/s41596-019-0264-1)

528 65. Team RC (2020) R: A language and environment for statistical computing. Version 4.0. 2 (Taking Off  
529 Again). R Foundation for Statistical Computing, Vienna, Austria.

530 66. Arbizu PM (2020). pairwiseAdonis: Pairwise multilevel comparison using adonis. R package version  
531 0.4.

532 67. Love MI, Huber W, Anders S (2014) Moderated estimation of fold change and dispersion for RNA-seq  
533 data with DESeq2. *Genome Biol* 15: 550. <https://doi.org/10.1186/s13059-014-0550-8>

534 68. Holmes I, Harris K, Quince C (2012) Dirichlet multinomial mixtures: generative models for microbial  
535 metagenomics. *PLoS One* 7: e30126. <https://doi.org/10.1371/journal.pone.0030126>

- 536 69. Correa-Galeote D, Bedmar EJ, Arone GJ (2018) Maize endophytic bacterial diversity as affected by  
537 soil cultivation history. *Front Microbiol* 9: 484. <https://doi.org/10.3389/fmicb.2018.00484>
- 538 70. Liu Y, Yan H, Zhang X, Zhang R, Li M, Xu T, Yang F, Zheng H, Zhao J (2020) Investigating the  
539 endophytic bacterial diversity and community structures in seeds of genetically related maize (*Zea mays*  
540 L.) genotypes. *3 Biotech* 10: 27. <https://doi.org/10.1007/s13205-019-2034-8>
- 541 71. Meliani A, Bensoltane A, Mederbel K (2012) Microbial diversity and abundance in soil: related to plant  
542 and soil type. *Am J Plant Nutr FertTechnol* 2: 10-18. <https://doi.org/10.3923/ajpnft.2012.10.18>
- 543 72. Martínez-Solís M, Collado MC, Herrero S (2020) Influence of diet, sex, and viral infections on the gut  
544 microbiota composition of *Spodoptera exigua* caterpillars. *Front Microbiol* 11: 753.  
545 <https://doi.org/10.3389/fmicb.2020.00753>
- 546 73. Mach N, Ruet A, Clark A, Bars-Cortina D, Ramayo-Caldas Y, Crisci E, Pennarun S, Dhorne-Pollet S,  
547 Foury A, Moisan M-P (2020) Priming for welfare: gut microbiota is associated with equitation conditions  
548 and behavior in horse athletes. *Sci Rep* 10:8311. <https://doi.org/10.1038/s41598-020-65444-9>
- 549 74. Hisada T, Endoh K, Kuriki K (2015) Inter- and intra-individual variations in seasonal and daily  
550 stabilities of the human gut microbiota in Japanese. *Arch Microbiol* 197: 919-934.  
551 <https://doi.org/10.1007/s00203-015-1125-0>
- 552 75. Dorrestein Pieter C, Mazmanian Sarkis K, Knight R (2014) Finding the missing links among  
553 metabolites, microbes, and the host. *Immunity* 40: 824-832. <https://doi.org/10.1016/j.immuni.2014.05.015>
- 554 76. Obadia B, Güvener ZT, Zhang V, Ceja-Navarro JA, Brodie EL, Ja WW, Ludington WB (2017)  
555 Probabilistic invasion underlies natural gut microbiome stability. *Curr Biol* 27: 1999-2006. e1998.  
556 <https://doi.org/10.1016/j.cub.2017.05.034>



- 557 77. Paniagua Voirol LR, Frago E, Kaltenpoth M, Hilker M, Fatouros NE (2018) Bacterial symbionts in  
558 Lepidoptera: their diversity, transmission, and impact on the host. *Front Microbiol* 9: 556.  
559 <https://doi.org/10.3389/fmicb.2018.00556>
- 560 78. Jones AG, Mason CJ, Felton GW, Hoover K (2019) Host plant and population source drive diversity of  
561 microbial gut communities in two polyphagous insects. *Sci Rep* 9: 2792. [https://doi.org/10.1038/s41598-](https://doi.org/10.1038/s41598-019-39163-9)  
562 019-39163-9
- 563 79. Gichuhi J, Sevgan S, Khamis F, Van den Berg J, du Plessis H, Ekesi S, Herren JK (2020) Diversity of  
564 fall armyworm, *Spodoptera frugiperda* and their gut bacterial community in Kenya. *PeerJ* 8: e8701.  
565 <https://doi.org/10.7717/peerj.8701>
- 566 80. Ugwu JA, Liu M, Sun H, Asiegbo FO (2020) Microbiome of the larvae of *Spodoptera frugiperda* (J.E.  
567 Smith) (Lepidoptera: Noctuidae) from maize plants. *J Appl Entomol* 144: 764-776.  
568 <https://doi.org/10.1111/jen.12821>
- 569 81. Ceja-Navarro JA, Vega FE, Karaoz U, Hao Z, Jenkins S, Lim HC, Kosina P, Infante F, Northen TR,  
570 Brodie EL (2015) Gut microbiota mediate caffeine detoxification in the primary insect pest of coffee. *Nat*  
571 *Commun* 6: 7618. <https://doi.org/10.1038/ncomms8618>
- 572 82. Indiragandhi P, Anandham R, Madhaiyan M, Poonguzhali S, Kim GH, Saravanan VS, Sa T (2007)  
573 Cultivable bacteria associated with larval gut of prothiofos-resistant, prothiofos-susceptible and field-  
574 caught populations of diamondback moth, *Plutella xylostella* and their potential for, antagonism towards  
575 entomopathogenic fungi and host insect nutrition. *J Appl Microbiol* 103: 2664-2675.  
576 <https://doi.org/10.1111/j.1365-2672.2007.03506.x>
- 577 83. Chen B, Teh B-S, Sun C, Hu S, Lu X, Boland W, Shao Y (2016) Biodiversity and activity of the gut  
578 microbiota across the life history of the insect herbivore *Spodoptera littoralis*. *Sci Rep* 6: 29505.  
579 <https://doi.org/10.1038/srep29505>

- 580 84. Rozadilla G, Cabrera NA, Virla EG, Greco NM, McCarthy CB (2020) Gut microbiota of *Spodoptera*  
581 *frugiperda* (J.E. Smith) larvae as revealed by metatranscriptomic analysis. J Appl Entomol 144: 351-363.  
582 <https://doi.org/10.1111/jen.12742>

## FIGURES CAPTIONS

**Fig. 1** Alpha diversity index of Shannon index (A, C) and observed taxa (B, D) obtained for samples from the gut microbiota of the corn and rice strains of *Spodoptera frugiperda* larvae (C, D) from different countries (A, B). The statistical values from the Test t (pairwise comparison) and ANOVA (group comparison) are shown in which box.

**Fig. 2** Principal coordinates analysis (PCoA) based on unweighted (A, B) and weighted (C, D) unifracs analysis of the midgut microbial community of the corn and rice strains of *Spodoptera frugiperda* larvae (B, D) from different countries (A, C). The statistical values from PERMANOVA are shown in each box.

**Fig. 3** Taxonomic composition of the microbial community associated with the midgut of corn and rice strains of *Spodoptera frugiperda* larvae sampled in different countries at the phylum level.

**Fig. 4** Taxonomic composition of the microbial community of the larval midgut of corn and rice strains of *Spodoptera frugiperda* at the genus level.

**Fig. 5** The abundance of *Klebsiella* and *Erysipelatoclostridium* as a differential feature of the microbiota associated with the larval midgut of *Spodoptera frugiperda* from different countries.

**Fig. 6** The abundance of *Erysipelatoclostridium* as a differential feature of the microbiota associated with the larval midgut of the corn and rice strains of *Spodoptera frugiperda*.

**Fig. 7** The core gut microbiota of *Spodoptera frugiperda* at the genus level identified by MicrobiomeAnalyst using the parameters sample prevalence (50 %) and relative abundance (0.5 %).

**Fig. 8** Pattern correlation analysis of the larval gut bacteria of *Spodoptera frugiperda* at the genus level. Red indicates positive correlation and blue indicates negative correlations with the presence of *Enterococcus* (A) or *Pseudomonas* (B).



**Table 2.** Post-hoc analysis of comparisons of the *Spodoptera frugiperda* gut microbial communities among countries using UniFrac (alpha 0.5) values.

| Pairs                | Df | SumsOfSqs | F.Model   | R2         | p.value | p.adjusted |
|----------------------|----|-----------|-----------|------------|---------|------------|
| Colombia vs Brazil   | 1  | 0.3806171 | 2.0309445 | 0.07245366 | 0.011   | 0.165      |
| Colombia vs Mexico   | 1  | 0.2728639 | 1.3648260 | 0.08882795 | 0.080   | 1.000      |
| Colombia vs Panama   | 1  | 0.2279787 | 1.1800870 | 0.07773915 | 0.196   | 1.000      |
| Colombia vs Paraguai | 1  | 0.3238154 | 1.6384779 | 0.12013642 | 0.095   | 1.000      |
| Colombia vs Peru     | 1  | 0.3136700 | 1.6244547 | 0.12867524 | 0.060   | 0.900      |
| Brazil vs Mexico     | 1  | 0.2544575 | 1.2752619 | 0.04675526 | 0.147   | 1.000      |
| Brazil vs Panama     | 1  | 0.3235731 | 1.6516793 | 0.05973161 | 0.044   | 0.660      |
| Brazil vs Paraguai   | 1  | 0.1472816 | 0.7425192 | 0.03000985 | 0.722   | 1.000      |
| Brazil vs Peru       | 1  | 0.2553736 | 1.3015037 | 0.05355651 | 0.151   | 1.000      |
| Mexico vs Panama     | 1  | 0.2217735 | 1.0281323 | 0.06841384 | 0.390   | 1.000      |
| Mexico vs Paraguai   | 1  | 0.2483650 | 1.1092582 | 0.08461640 | 0.292   | 1.000      |
| Mexico vs Peru       | 1  | 0.2227645 | 1.0045716 | 0.08368242 | 0.383   | 1.000      |
| Panama vs Paraguai   | 1  | 0.2516586 | 1.1648641 | 0.08848281 | 0.254   | 1.000      |
| Panama vs Peru       | 1  | 0.2287484 | 1.0730526 | 0.08887998 | 0.328   | 1.000      |
| Paraguai vs Peru     | 1  | 0.1878847 | 0.8404890 | 0.08541130 | 0.553   | 1.000      |

624  
625  
626  
627

31

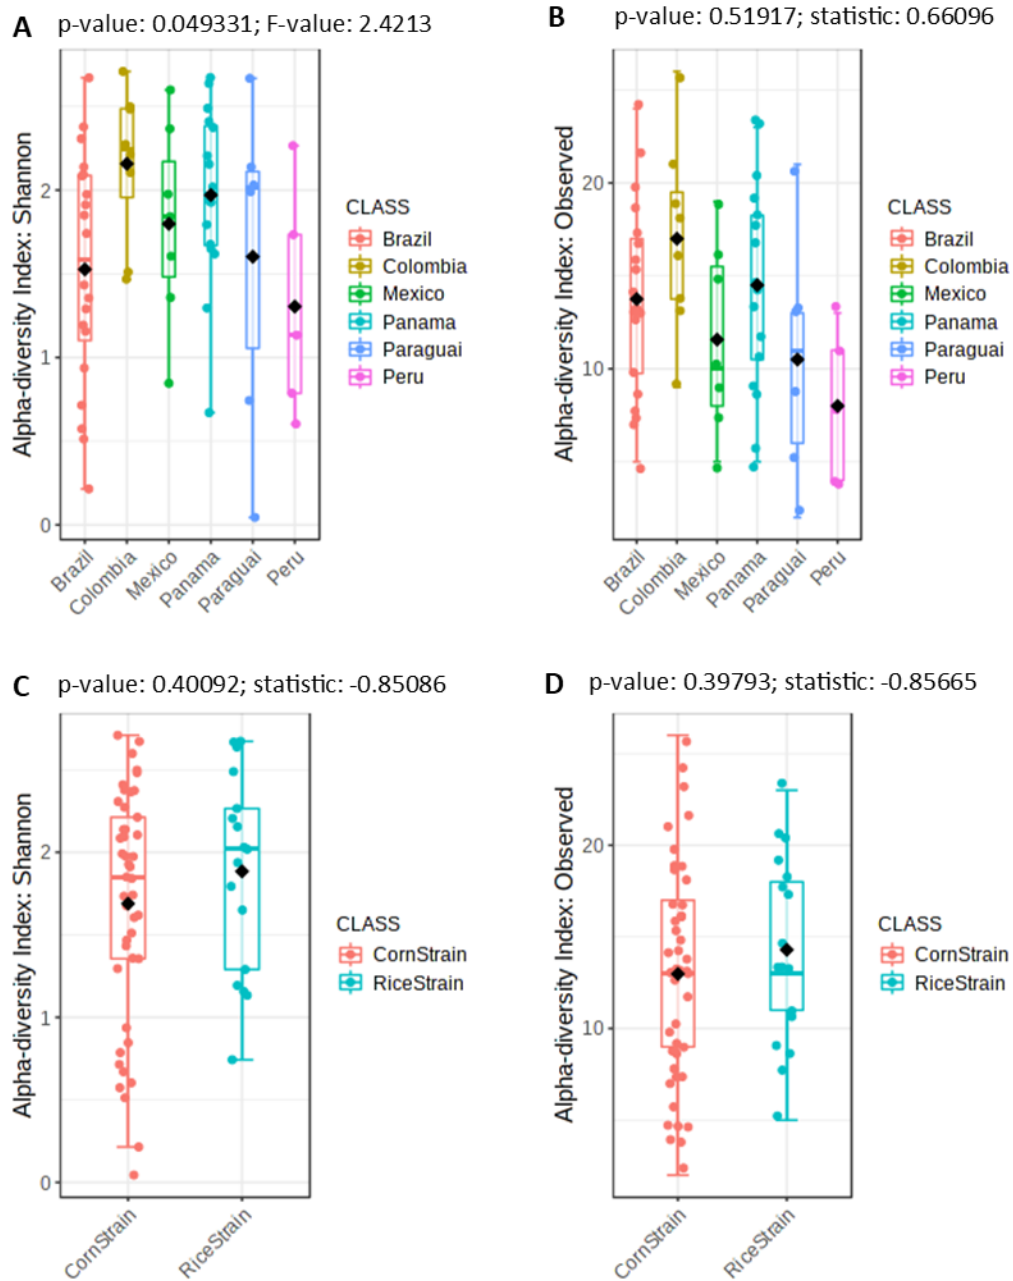

628

629 Fig 1

32

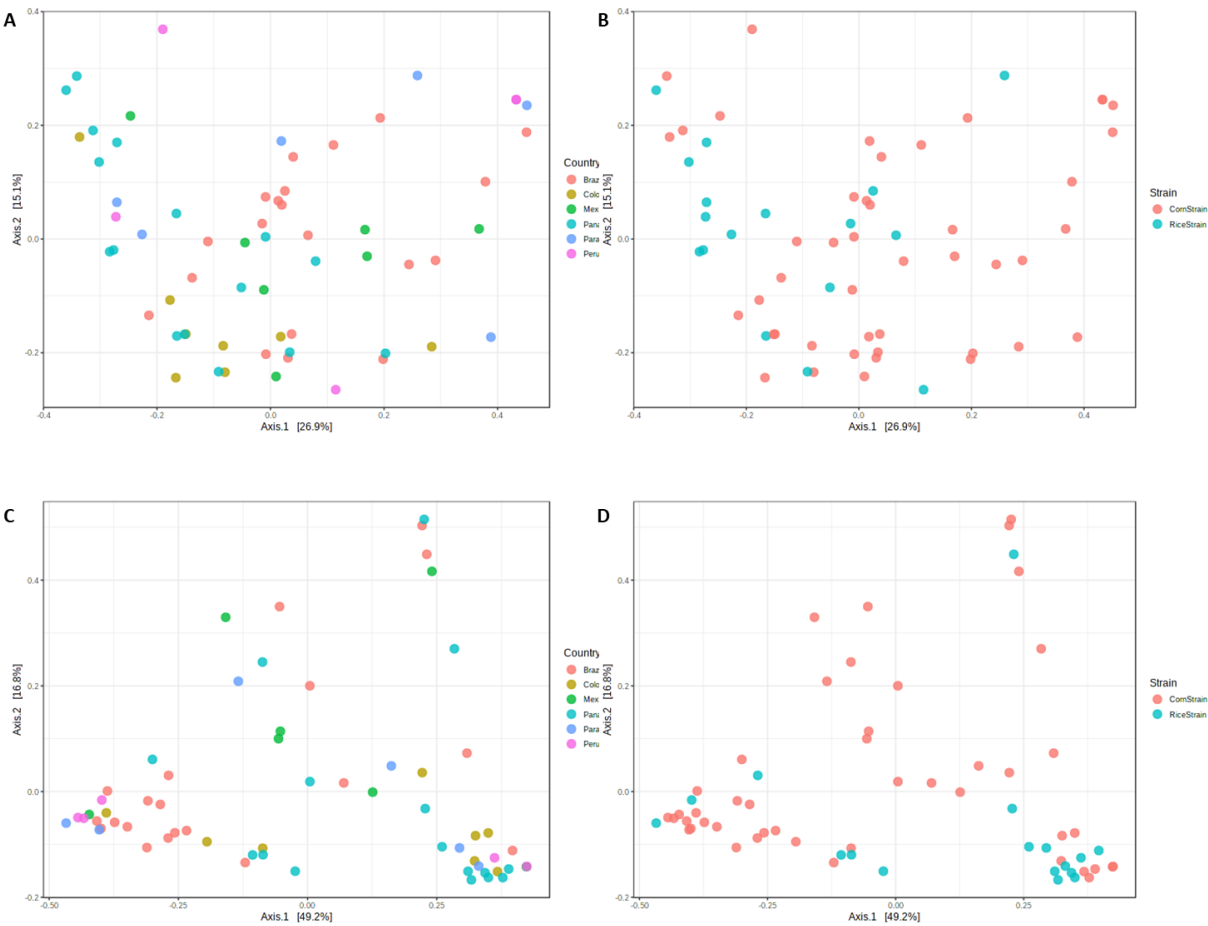

630

631 Fig2



33

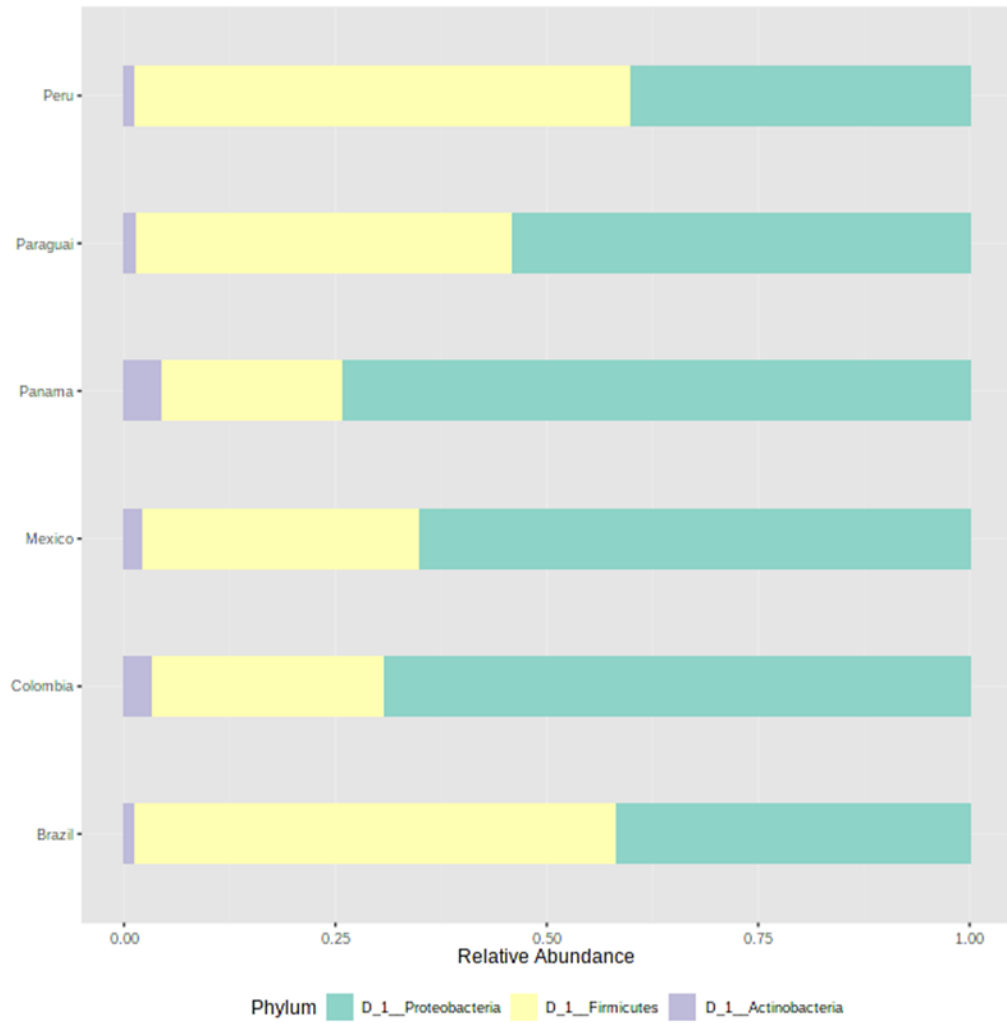

632

633 Fig 3

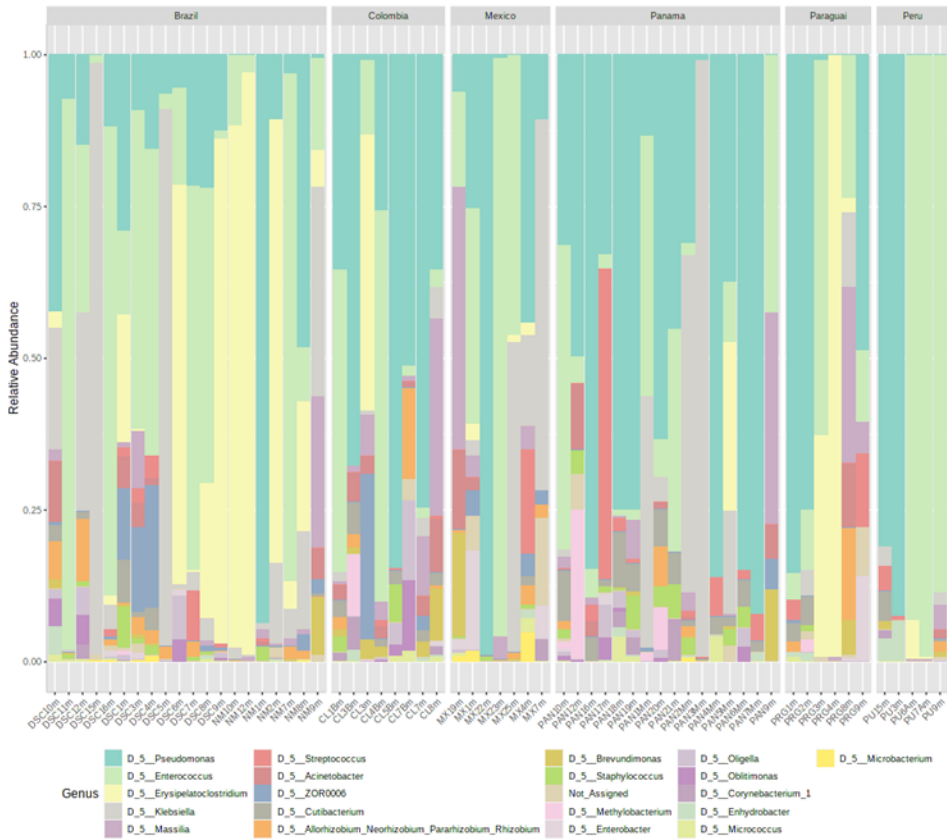

Fig 4

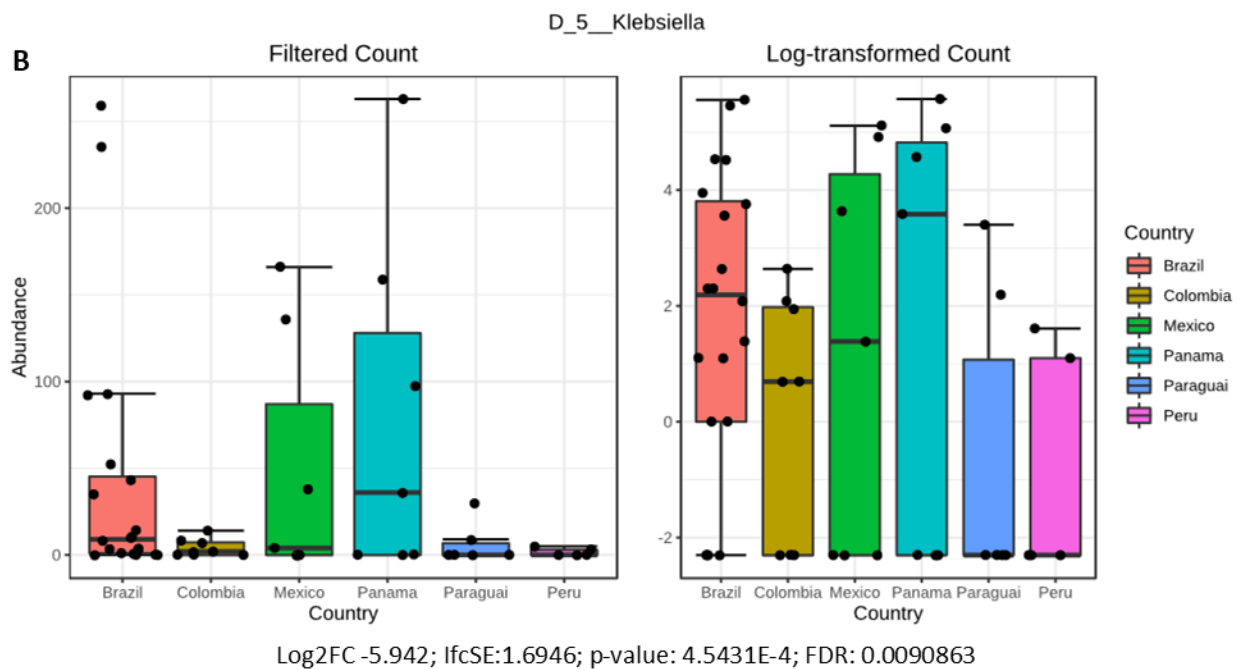

639 Fig 5

36

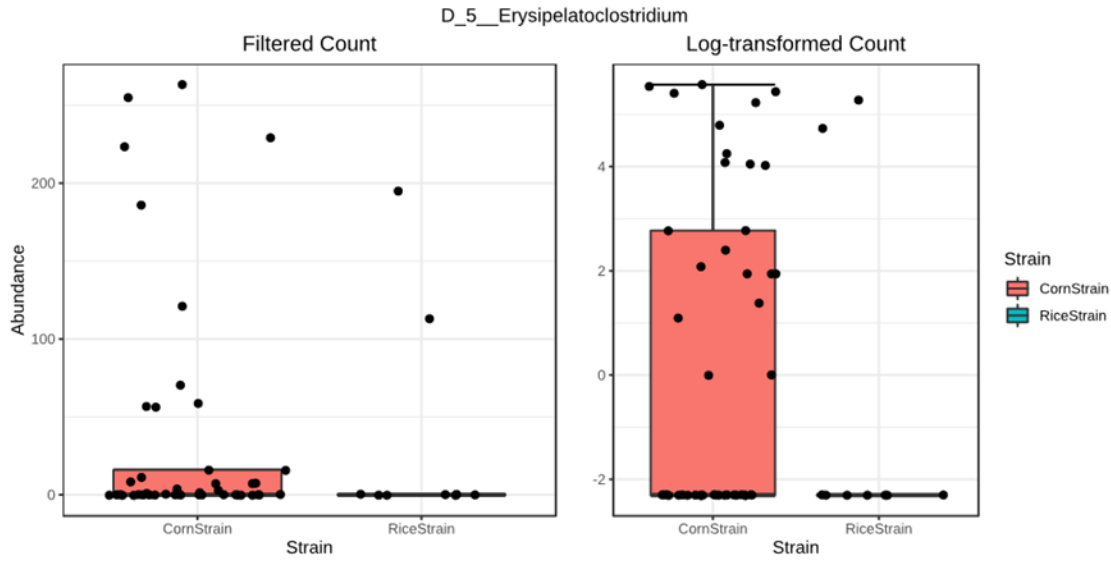

Fig 6

37

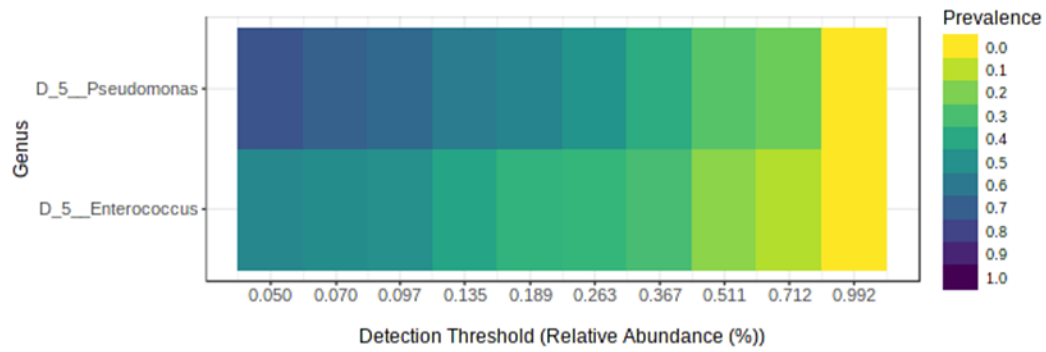

644

645

646 Fig 7

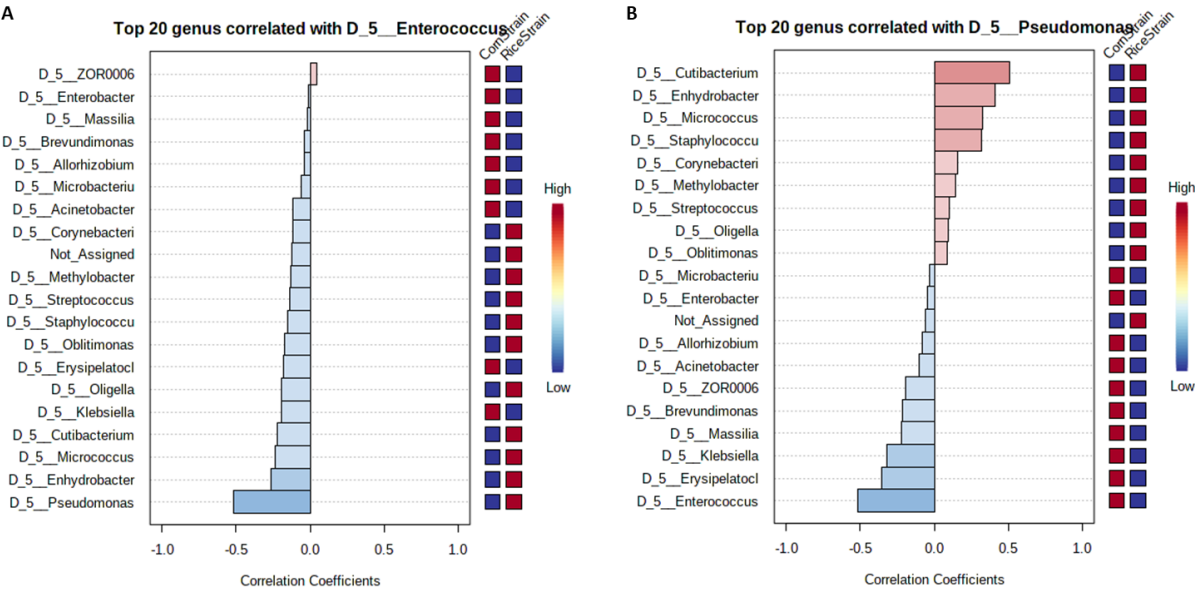

Fig 8

651

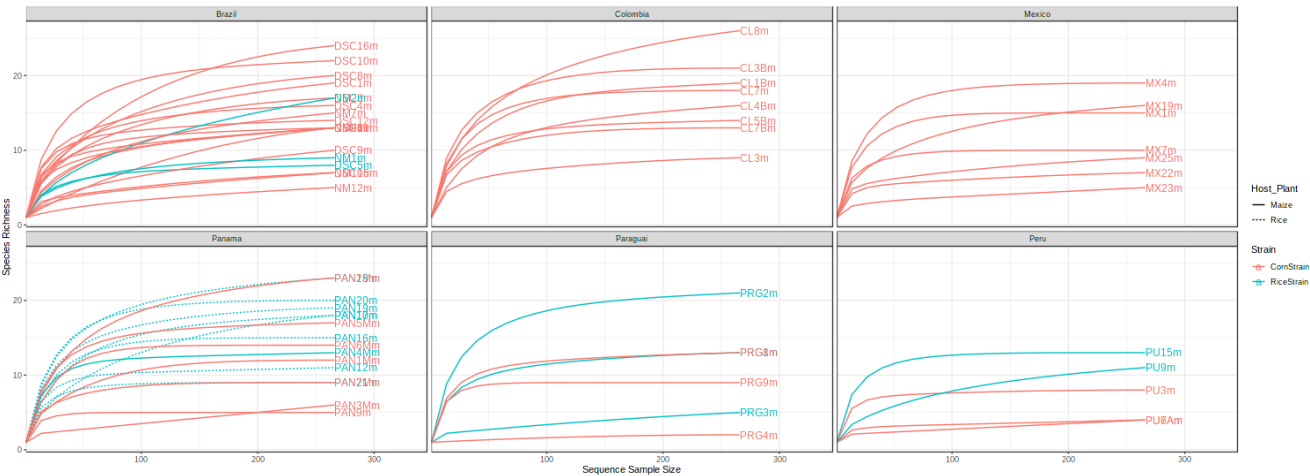

652

653

654

655

656

657

Fig. S1 Rarefaction curves showing the relationship between number of ASVs and number of sequences. The rarefaction curve for the midgut of *Spodoptera frugiperda* strains (RS= red and CS=blue) fed on and maize collected in different countries.
